# Supplementary material for: Plasma oxalic acid and cardiovascular risk in end-stage renal disease patients: a prospective, observational cohort pilot study
Source: PubMed Central journal article supplement — Korean J Intern Med. 2021 Jun 25;37(1):167–78. doi: 10.3904/kjim.2020.561 (PMC8747923; doi:10.3904/kjim.2020.561), 2021-06-25
Supplement: kjim-2020-561-suppl1.pdf [file kjim-2020-561-suppl1.pdf]

**Supplementary Table 1. HR of baseline parameters for cardiovascular event risk factors according to the analyzed sample**

| Variable                        | Value  | Standard error | Wald $\chi^2$ | <i>p</i> value | HR (95% CI)        |
|---------------------------------|--------|----------------|---------------|----------------|--------------------|
| Age, yr                         | 0.074  | 0.032          | 5.394         | 0.020          | 1.07 (1.01–1.14)   |
| Systolic blood pressure, mmHg   | –0.012 | 0.026          | 0.217         | 0.642          | 0.98 (0.94–1.04)   |
| Diastolic blood pressure, mmHg  | 0.060  | 0.050          | 1.428         | 0.232          | 1.06 (0.96–1.17)   |
| Diabetes                        | 2.146  | 0.736          | 8.506         | 0.004          | 8.55 (2.02–36.2)   |
| Male sex                        | –0.508 | 0.708          | 0.515         | 0.473          | 0.61 (0.15–2.4)    |
| TNF- $\alpha$ , pg/mL           | –0.171 | 0.246          | 0.485         | 0.486          | 0.84 (0.52–1.36)   |
| IL-6, pg/mL                     | 0.083  | 0.038          | 4.609         | 0.032          | 1.08 (1.007–1.17)  |
| MCP-1, pg/mL                    | 0.003  | 0.003          | 0.969         | 0.325          | 1.003 (0.99–1.008) |
| Dialysis modality               | 0.830  | 0.731          | 1.287         | 0.257          | 2.3 (0.55–9.6)     |
| Dialysis duration, mo           | –0.002 | 0.006          | 0.060         | 0.806          | 0.99 (0.98–1.01)   |
| Anuria                          | –0.152 | 0.821          | 0.034         | 0.854          | 0.86 (0.17–4.3)    |
| POx, $\mu$ mol/L                | 0.028  | 0.012          | 5.808         | 0.016          | 1.03 (1.005–1.05)  |
| Serum uric acid, mmol/L         | 0.000  | 0.004          | 0.011         | 0.915          | 1.0 (0.99–1.008)   |
| Cholesterol, mmol/L             | 0.158  | 0.195          | 0.651         | 0.420          | 1.17 (0.8–1.7)     |
| Triglycerides, mmol/L           | 0.330  | 0.292          | 1.280         | 0.037          | 1.39 (1.09–2.46)   |
| HDL-C, mmol/L                   | –1.063 | 1.087          | 0.957         | 0.328          | 0.34 (0.04–2.9)    |
| LDL-C, mmol/L                   | –0.111 | 0.286          | 0.152         | 0.697          | 0.9 (0.51–1.56)    |
| VLDL-C, mmol/L                  | 0.379  | 0.620          | 0.373         | 0.541          | 1.46 (0.43–4.9)    |
| AIP                             | 0.216  | 0.222          | 0.946         | 0.331          | 1.24 (0.8–1.92)    |
| RRF, mL/min/1.73 m <sup>2</sup> | –0.059 | 0.212          | 0.077         | 0.782          | 0.94 (0.62–1.43)   |
| BMI, kg/m <sup>2</sup>          | 0.100  | 0.048          | 4.347         | 0.037          | 1.1 (1.006–1.21)   |
| Glucose <sub>blood</sub>        | 0.137  | 0.067          | 4.166         | 0.041          | 1.14 (1.005–1.3)   |
| Proteine <sub>blood</sub>       | 0.095  | 0.073          | 1.685         | 0.194          | 1.1 (0.95–1.27)    |
| Serum albumin, g/L              | 0.125  | 0.109          | 1.325         | 0.250          | 1.13 (0.91–1.4)    |
| Hemoglobin, g/L                 | 0.075  | 0.026          | 8.357         | 0.004          | 1.08 (1.025–1.13)  |
| Ca, mmol/L                      | –0.070 | 0.327          | 0.046         | 0.830          | 0.93 (0.49–1.77)   |
| P, mmol/L                       | 0.873  | 0.478          | 3.327         | 0.068          | 2.4 (0.94–6.2)     |
| iPTH, ng/mL                     | 0.004  | 0.002          | 4.600         | 0.032          | 1.004 (1.0–1.008)  |
| CRP, g/L                        | 0.014  | 0.035          | 0.171         | 0.680          | 1.02 (0.95–1.08)   |
| K, mmol/L                       | 0.921  | 0.526          | 3.063         | 0.080          | 2.5 (0.95–7.04)    |

HR, hazard ratio; CI, confidence interval; TNF- $\alpha$ , tumor necrosis factor-alpha; IL-6, interleukin-6; MCP-1, monocyte chemoattractant protein-1; POx, plasma oxalic acid; HDL-C, high-density lipoprotein cholesterol; LDL-C, low-density lipoprotein cholesterol; VLDL-C, very-low-density lipoprotein cholesterol; AIP, atherogenic index of plasma; RRF, renal residual function; BMI, body mass index; iPTH, intact parathyroid hormone; CRP, C-reactive protein.
