# Supplementary material for: Plasma oxalic acid and cardiovascular risk in end-stage renal disease patients: a prospective, observational cohort pilot study
Source: PubMed Central journal article supplement — Korean J Intern Med. 2021 Jun 25;37(1):167–78. doi: 10.3904/kjim.2020.561 (PMC8747923; doi:10.3904/kjim.2020.561), 2021-06-25
Supplement: kjim-2020-561-suppl2.pdf [file kjim-2020-561-suppl2.pdf]

**Supplementary Table 2. Correlation matrix (the Spearman correlation test)**

| Variable              | TNF- $\alpha$ ,<br>pg/mL | IL-6, pg/<br>mL     | MCP-1,<br>pg/mL    | POx,<br>$\mu$ mol/L | TC,<br>mmol/L      | TG,<br>mmol/L       | HDL-C,<br>mmol/L    | LDL-C,<br>mmol/L   | VLDL-C,<br>mmol/L  | AIP                | CRP,<br>g/L        |
|-----------------------|--------------------------|---------------------|--------------------|---------------------|--------------------|---------------------|---------------------|--------------------|--------------------|--------------------|--------------------|
| TNF- $\alpha$ , pg/mL | -                        | 0.342 <sup>a</sup>  | 0.150              | 0.001               | -0.105             | 0.155               | -0.301 <sup>a</sup> | 0.097              | 0.146              | 0.186              | 0.126              |
| IL-6, pg/mL           | 0.342 <sup>a</sup>       | -                   | 0.258              | 0.495 <sup>a</sup>  | 0.290 <sup>a</sup> | 0.769 <sup>a</sup>  | -0.441 <sup>a</sup> | 0.260              | 0.424 <sup>a</sup> | 0.492 <sup>a</sup> | 0.336 <sup>a</sup> |
| MCP-1, pg/mL          | 0.150                    | 0.258               | -                  | 0.550 <sup>a</sup>  | 0.190              | 0.299 <sup>a</sup>  | 0.152               | 0.325 <sup>a</sup> | 0.011              | 0.192              | -0.133             |
| POx, $\mu$ mol/L      | 0.001                    | 0.495 <sup>a</sup>  | 0.550 <sup>a</sup> | -                   | 0.232              | 0.557 <sup>a</sup>  | -0.215              | 0.010              | 0.211              | 0.344 <sup>a</sup> | -0.040             |
| TC, mmol/L            | -0.105                   | 0.290 <sup>a</sup>  | 0.190              | 0.232               | -                  | 0.536 <sup>a</sup>  | 0.078               | 0.571 <sup>a</sup> | 0.620 <sup>a</sup> | 0.700 <sup>a</sup> | 0.291 <sup>a</sup> |
| TG, mmol/L            | 0.155                    | 0.769 <sup>a</sup>  | 0.299 <sup>a</sup> | 0.557 <sup>a</sup>  | 0.536 <sup>a</sup> | -                   | -0.468 <sup>a</sup> | 0.430 <sup>a</sup> | 0.580 <sup>a</sup> | 0.647 <sup>a</sup> | 0.351 <sup>a</sup> |
| HDL-C,<br>mmol/L      | -0.301 <sup>a</sup>      | -0.441 <sup>a</sup> | 0.152              | -0.215              | 0.078              | -0.468 <sup>a</sup> | -                   | -0.065             | -0.171             | -0.272             | -0.260             |
| LDL-C,<br>mmol/L      | 0.097                    | 0.260               | 0.325 <sup>a</sup> | 0.010               | 0.571 <sup>a</sup> | 0.430 <sup>a</sup>  | -0.065              | -                  | 0.197              | 0.523 <sup>a</sup> | 0.228              |
| VLDL-C,<br>mmol/L     | 0.146                    | 0.424 <sup>a</sup>  | 0.011              | 0.211               | 0.620 <sup>a</sup> | 0.580 <sup>a</sup>  | -0.171              | 0.197              | -                  | 0.681 <sup>a</sup> | 0.342 <sup>a</sup> |
| AIP                   | 0.186                    | 0.492 <sup>a</sup>  | 0.192              | 0.344 <sup>a</sup>  | 0.700 <sup>a</sup> | 0.647 <sup>a</sup>  | -0.272              | 0.523 <sup>a</sup> | 0.681 <sup>a</sup> | -                  | 0.379 <sup>a</sup> |
| CRP, g/L              | 0.126                    | 0.336 <sup>a</sup>  | -0.133             | -0.040              | 0.291 <sup>a</sup> | 0.351 <sup>a</sup>  | -0.260              | 0.228              | 0.342 <sup>a</sup> | 0.379 <sup>a</sup> | -                  |

TNF- $\alpha$ , tumor necrosis factor-alpha; IL-6, interleukin-6; MCP-1, monocyte chemoattractant protein-1; POx, plasma oxalic acid; TC, total cholesterol; TG, triglyceride; HDL-C, high-density lipoprotein cholesterol; LDL-C, low-density lipoprotein cholesterol; VLDL-C, very-low-density lipoprotein cholesterol; AIP, atherogenic index of plasma; CRP, C-reactive protein.

<sup>a</sup>The values are different from 0 at a significance level of  $\alpha < 0.05$ .
