# Supplementary material for: Plasma oxalic acid and cardiovascular risk in end-stage renal disease patients: a prospective, observational cohort pilot study
Source: PubMed Central journal article supplement — Korean J Intern Med. 2021 Jun 25;37(1):167–78. doi: 10.3904/kjim.2020.561 (PMC8747923; doi:10.3904/kjim.2020.561), 2021-06-25
Supplement: kjim-2020-561-suppl3.pdf [file kjim-2020-561-suppl3.pdf]

**Supplementary Table 3. ROC curve characteristics for the cut-off value of POx concentration to predict cardiovascular events in the ESRD patients**

| Characteristic           | Value       |
|--------------------------|-------------|
| Area under the ROC curve | 0.802       |
| Standard error           | 0.0732      |
| 95% Confidence interval  | 0.665–0.901 |
| z statistic              | 4.128       |
| Significance level       | < 0.001     |
| Youden index             | 0.631       |
| Associated criterion     | > 62.94     |
| Sensitivity, %           | 75.00       |
| Specificity, %           | 88.10       |

ROC, receiver operating characteristic; POx, plasma oxalic acid; ESRD, end-stage renal disease.
