# Supplementary material for: Plasma oxalic acid and cardiovascular risk in end-stage renal disease patients: a prospective, observational cohort pilot study
Source: PubMed Central journal article supplement — Korean J Intern Med. 2021 Jun 25;37(1):167–78. doi: 10.3904/kjim.2020.561 (PMC8747923; doi:10.3904/kjim.2020.561), 2021-06-25
Supplement: kjim-2020-561-suppl4.pdf [file kjim-2020-561-suppl4.pdf]

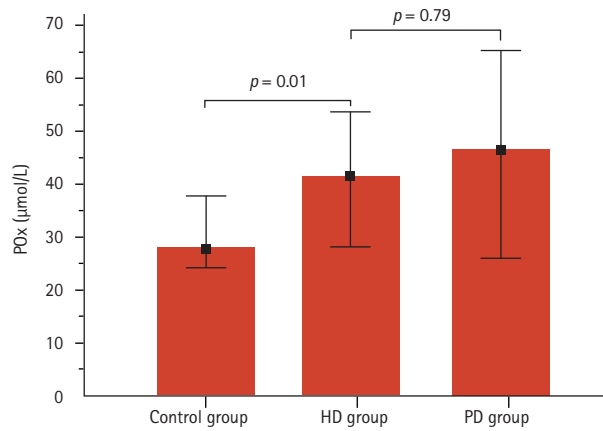

**Supplementary Figure 1.** Plasma oxalic acid (POx) concentration in the healthy subjects and the end-stage renal disease patients according to dialysis modality. Data is presented as median (interquartile range). HD, hemodialysis; PD, peritoneal dialysis.
