# Supplementary material for: Plasma oxalic acid and cardiovascular risk in end-stage renal disease patients: a prospective, observational cohort pilot study
Source: PubMed Central journal article supplement — Korean J Intern Med. 2021 Jun 25;37(1):167–78. doi: 10.3904/kjim.2020.561 (PMC8747923; doi:10.3904/kjim.2020.561), 2021-06-25
Supplement: kjim-2020-561-suppl7.pdf [file kjim-2020-561-suppl7.pdf]

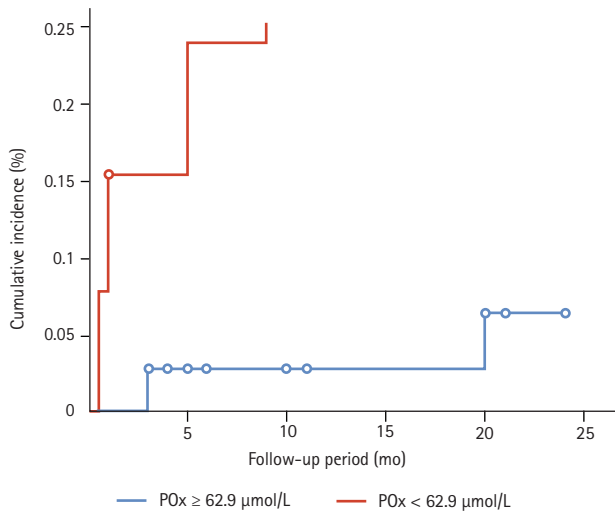

**Supplementary Figure 4.** Cumulative incidence of cardiovascular events according to plasma oxalic acid (POx) concentration in the end-stage renal disease patients ( $\geq 62.9 \mu\text{mol/L}$  vs.  $< 62.9 \mu\text{mol/L}$ ).
